# Supplementary material
Source: PubMed Central journal article supplement (PMC6317887)
Supplement: NIHMS1510831-supplement-2.pdf [file NIHMS1510831-supplement-2.pdf]

## Supporting Information

### Risk Tradeoffs Associated with Traditional Food Advisories for Labrador Inuit

Ryan S.D. Calder <sup>a,b\*</sup>, Sabri Bromage <sup>c</sup>, Elsie M. Sunderland <sup>a,b</sup>

<sup>a</sup> Department of Environmental Health, Harvard T.H. Chan School of Public Health, Boston MA, 02215, USA

<sup>b</sup> Harvard John A. Paulson School of Engineering and Applied Sciences, Cambridge MA, 02138, USA

<sup>c</sup> Department of Nutrition, Harvard T.H. Chan School of Public Health, Boston MA, 02115, USA

\* Corresponding author current contact information: Department of Civil and Environmental Engineering, Duke Pratt School of Engineering. 1116 Hudson Hall, Box 90287, Duke University, Durham NC, 27708, USA. T: (919) 355-6876; F: (919) 660-5219; [ryan.calder@duke.edu](mailto:ryan.calder@duke.edu)

#### Contents

|                                                                                 |    |
|---------------------------------------------------------------------------------|----|
| Supplemental methods for dietary survey.....                                    | 9  |
| Derivation of dose-response functions for cardiovascular and cancer risks ..... | 15 |
| References.....                                                                 | 23 |

#### Figures

|                                                                              |    |
|------------------------------------------------------------------------------|----|
| Figure S1: Map of the Labrador Inuit Settlement Area .....                   | 2  |
| Figure S2: Sources of per-capita MeHg intakes among Lake Melville Inuit..... | 17 |
| Figure S3: Main categories of store-bought nutritious foods.....             | 18 |

#### Tables

|                                                                                                                                                                                              |    |
|----------------------------------------------------------------------------------------------------------------------------------------------------------------------------------------------|----|
| Table S1: Food frequency questionnaire data .....                                                                                                                                            | 3  |
| Table S2: Demographic breakdown of study participants in summer survey round vs. general population.....                                                                                     | 4  |
| Table S3: MeHg concentrations, dietary database information and per-capita caloric significance for locally caught traditional seafood .....                                                 | 5  |
| Table S4: MeHg concentrations, dietary database information and per-capita caloric significance for other locally caught traditional foods.....                                              | 7  |
| Table S5: MeHg concentrations, dietary database information and per-capita caloric significance for store-bought seafood .....                                                               | 8  |
| Table S6: Dietary database information and per-capita caloric significance for store-bought nutritious foods.....                                                                            | 10 |
| Table S7: Probability distribution of peak MeHg concentrations in locally caught traditional foods following upstream hydroelectric development, first reported by Calder et al. (2016)..... | 13 |
| Table S8: Summary statistics for modeled population-wide MeHg exposures.....                                                                                                                 | 16 |
| Table S9: Traditional food intake by season and demographic group.....                                                                                                                       | 19 |
| Table S10: Modeled neurodevelopmental impacts.....                                                                                                                                           | 20 |
| Table S11: Modeled cardiovascular impacts .....                                                                                                                                              | 21 |
| Table S12: Modeled cancer impacts.....                                                                                                                                                       | 22 |

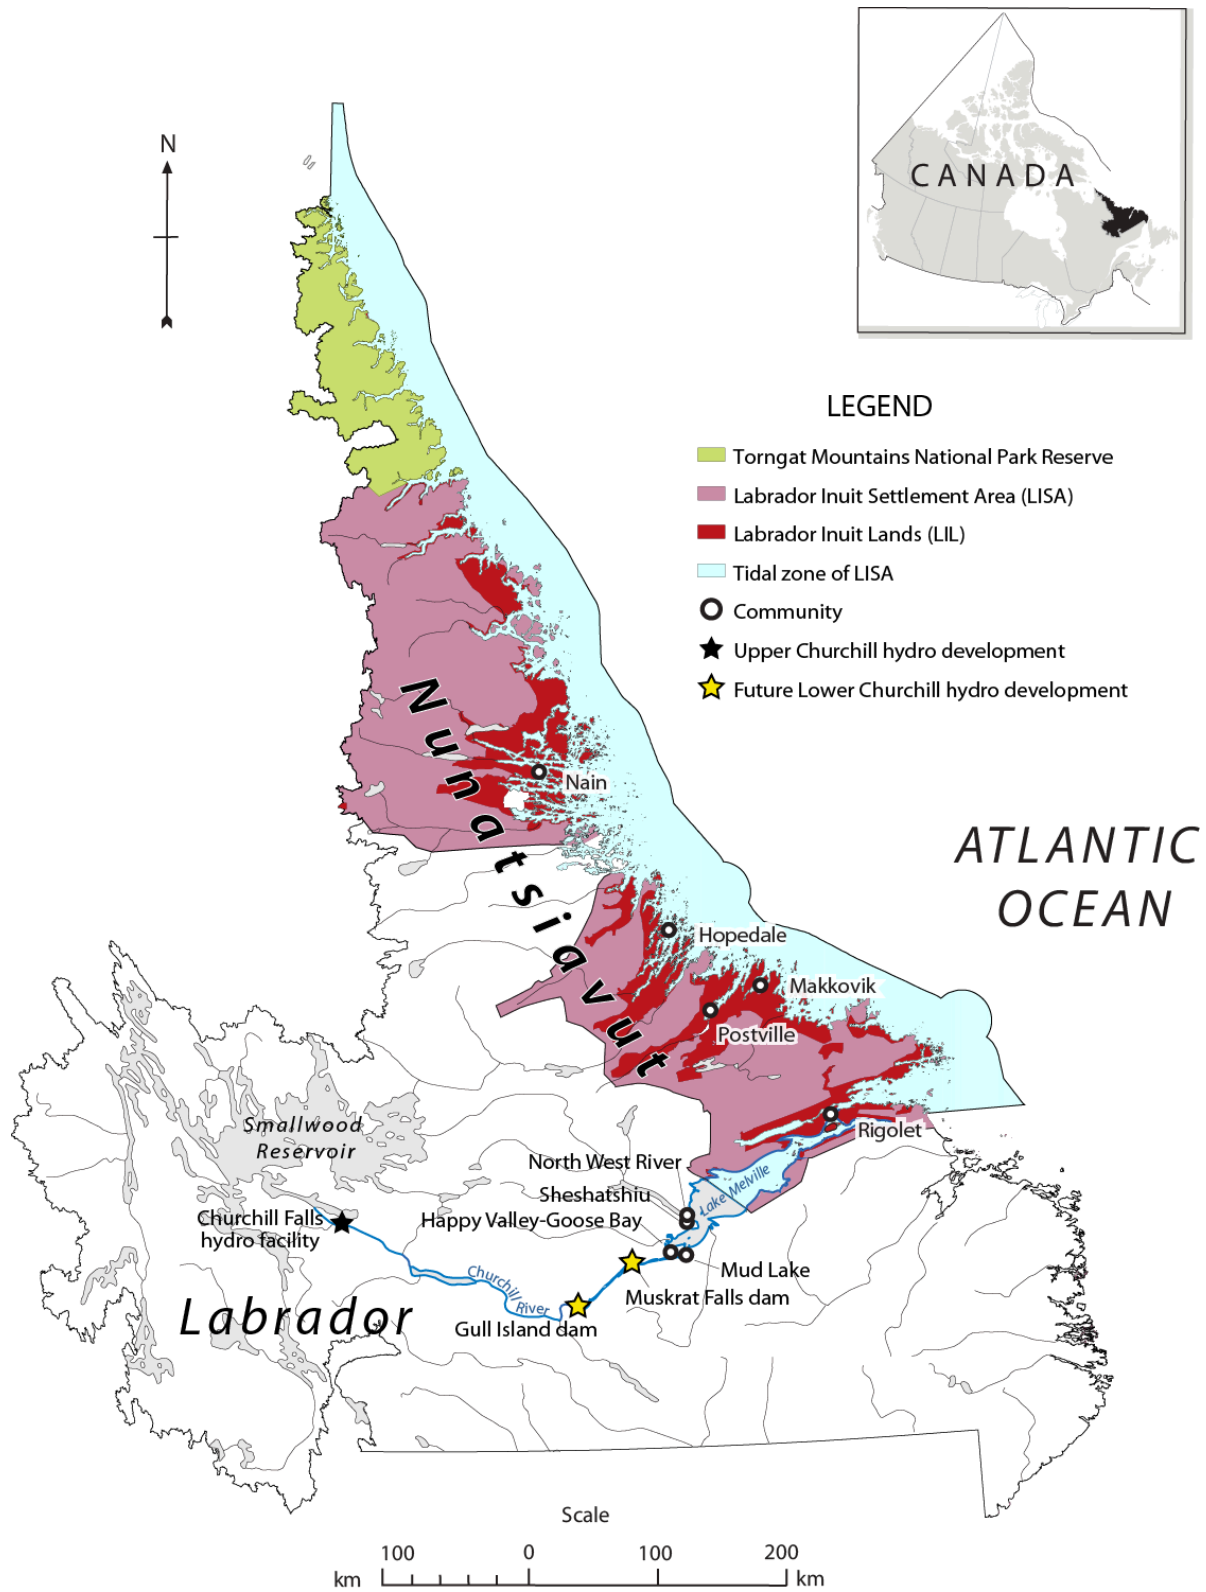

Figure S1: Map of the Labrador Inuit Settlement Area, existing and future hydroelectric developments on the Churchill River, and locations of indigenous communities. Source: Durkalec et al. (2016). Reprinted with permission from Nunatsiavut Government.

Table S1: Food frequency questionnaire data collected in March/April (winter), June/July (spring) and August/September (summer) 2014, adapted from Calder et al. (2016).

| Demographic Group                                            | Winter ( <i>n</i> ) | Spring ( <i>n</i> ) | Summer ( <i>n</i> ) | Total ( <i>n</i> ) | Unique individuals (fraction of Inuit population) <sup>a</sup> |
|--------------------------------------------------------------|---------------------|---------------------|---------------------|--------------------|----------------------------------------------------------------|
| All individuals                                              | 231                 | 294                 | 1054 <sup>b</sup>   | 1579 <sup>b</sup>  | 1,145 <sup>b</sup>                                             |
| Non-Inuit household <sup>c</sup> members                     | 34                  | 49                  | 167                 | 250                | 188                                                            |
| Inuit individuals                                            | 197                 | 245                 | 882                 | 1324               | 952 (38%)                                                      |
| <u>Communities</u>                                           |                     |                     |                     |                    |                                                                |
| Happy Valley-Goose Bay <sup>d</sup>                          | 170                 | 217                 | 667                 | 1054               | 745 (31%)                                                      |
| North West River                                             | 30                  | 34                  | 158                 | 222                | 167 (43%)                                                      |
| Rigolet                                                      | 31                  | 43                  | 229                 | 303                | 233 (87%)                                                      |
| <u>Demographic Group<sup>e</sup></u>                         |                     |                     |                     |                    |                                                                |
| Women of childbearing age (16-49) <sup>f</sup>               | 59                  | 77                  | 278                 | 414                | 306                                                            |
| Children ≤12 years                                           | 55                  | 59                  | 166                 | 280                | 179                                                            |
| Women of childbearing age (16-49) & children ≤ 12 in Rigolet | 15                  | 19                  | 100                 | 134                | 101                                                            |
| All male >12 years                                           | 74                  | 108                 | 387                 | 569                | 406                                                            |
| All female > 49 years                                        | 28                  | 37                  | 191                 | 256                | 200                                                            |

<sup>a</sup> Data from some individuals are for multiple survey periods. Total Inuit population is based on the 2011 Census and National Household Survey (Statistics Canada 2012; Statistics Canada 2013).

<sup>b</sup> Total includes three individuals who did not report Inuit status.

<sup>c</sup> Non-Inuit individuals who share a household with a registered Inuit beneficiary identified by the Nunatsiavut Government were included in the survey.

<sup>d</sup> Includes the nearby community of Mud Lake (*n* = 22).

<sup>e</sup> Combined data for all three communities.

<sup>f</sup> As defined by the U.S. National Health and Nutrition Examination Survey (McDowell et al. 2004).

Table S2: Demographic breakdown of study participants in summer survey round vs. general population.

|               | Happy Valley-Goose Bay |                         | North West River    |                         | Rigolet             |                         |
|---------------|------------------------|-------------------------|---------------------|-------------------------|---------------------|-------------------------|
| <i>Male</i>   | Sample <sup>a</sup>    | Population <sup>b</sup> | Sample <sup>a</sup> | Population <sup>b</sup> | Sample <sup>a</sup> | Population <sup>b</sup> |
| 0–17          | 64                     | 830                     | 5                   | 60                      | 29                  | 35                      |
| 18–44         | 105                    | 1,405                   | 13                  | 85                      | 41                  | 65                      |
| 45–64         | 75                     | 1,100                   | 28                  | 95                      | 31                  | 40                      |
| ≥65           | 31                     | 320                     | 29                  | 35                      | 10                  | 20                      |
| <i>Female</i> |                        |                         |                     |                         |                     |                         |
| 0–17          | 80                     | 218                     | 7                   | 50                      | 34                  | 35                      |
| 18–44         | 171                    | 407                     | 16                  | 85                      | 45                  | 55                      |
| 45–64         | 94                     | 278                     | 31                  | 95                      | 30                  | 40                      |
| ≥65           | 41                     | 87                      | 27                  | 35                      | 8                   | 5                       |

<sup>a</sup> Summer (August-September) survey round only. Excludes nine participants whose age was not recorded.

<sup>b</sup> Age bracket counts available for total (Inuit and non-Inuit) population only rounded to multiples of 5 (Statistics Canada 2013). Sample as a fraction of total Inuit population reported in Table S1.

Table S3: MeHg concentrations, dietary database information and per-capita caloric significance for locally caught traditional seafood

| Food name<br>(nutritional category) <sup>a</sup> | Name in nutritional database                                  | Database<br>code <sup>b</sup> | Baseline<br>calories<br>(%) <sup>c</sup> | MeHg<br>Mean ± SD<br>(ng g <sup>-1</sup> ww) <sup>d</sup> |
|--------------------------------------------------|---------------------------------------------------------------|-------------------------------|------------------------------------------|-----------------------------------------------------------|
| Arctic char liver (FL)                           | n/a                                                           |                               | 4.7                                      | 75.5                                                      |
| Arctic char muscle (FM)                          | Fish, arctic char, native, meat, raw                          | 3230                          | 4.9                                      | 62.4 ± 41.8                                               |
| Arctic char roe (FR)                             | Fish, roe, mixed species, raw                                 | 3045                          | 0.1                                      | 7.49                                                      |
| Atlantic cod muscle (FM)                         | Fish, cod (scrod), Atlantic, baked or broiled                 | 3195                          | 5.1                                      | 186 ± 57.4                                                |
| Atlantic salmon liver (FL)                       | Fish, salmon, native, king or chinook, liver                  | 5899                          | 0.7                                      | 88.6                                                      |
| Atlantic salmon muscle (FM)                      | Fish, salmon, Atlantic, wild, baked or broiled                | 3156                          | 46.9                                     | 73.2 ± 20.1                                               |
| Atlantic salmon roe (FR)                         | Fish, salmon, native, eggs, raw                               | 5928                          | 1.9                                      | 8.78                                                      |
| Brook trout liver (FL)                           | n/a                                                           |                               | 0.8                                      | 95.2 ± 34.4                                               |
| Brook trout muscle (FM)                          | Fish, trout, brook, raw                                       | 7234                          | 11.7                                     | 105 ± 34.4                                                |
| Brook trout roe (FR)                             | Fish, roe, mixed species, raw                                 | 3045                          | 0.6                                      | 52.7 ± 22.4                                               |
| Capelin muscle (FM)                              | Fish, smelt, rainbow (American, capelin), baked or broiled    | 3065                          | 0.9                                      | 17 ± 2.24                                                 |
| Capelin roe (FR)                                 | Fish, roe, mixed species, raw                                 | 3045                          | 0.04                                     | 2.04                                                      |
| Clams (SF)                                       | Mollusks, clam, mixed species, boiled or steamed              | 3111                          | 0.2                                      | 10 ± 2                                                    |
| Flatfish (FM)                                    | Fish, flatfish (flounder or sole or plaice), baked or broiled | 3007                          | 0.03                                     | 68 ± 41                                                   |
| Itiks (SF)                                       | n/a                                                           |                               | 0.03                                     | 40                                                        |
| Lake trout (FM)                                  | Fish, trout, brook, raw                                       | 7234                          | 0.9                                      | 99 ± 46                                                   |
| Mussels (SF)                                     | Mollusks, mussel, blue, boiled or steamed                     | 3116                          | 1.5                                      | 3.46 ± 0.5                                                |
| Ouananiche (FM)                                  | Fish, salmon, Atlantic, wild, baked or broiled                | 3156                          | 0.02                                     | 150 ± 110                                                 |
| Porpoise blubber (MM)                            | n/a                                                           |                               | 0.02                                     | ~0                                                        |
| Porpoise liver (MM)                              | n/a                                                           |                               | 0                                        | 1,220 ± 870                                               |
| Porpoise meat (MM)                               | n/a                                                           |                               | 0.02                                     | 600 ± 450                                                 |
| Rock cod liver (FL)                              | Fish, lingcod, native, liver                                  | 5888                          | 1.0                                      | 225                                                       |
| Rock cod muscle (FM)                             | Fish, cod (scrod), Atlantic, baked or broiled                 | 3195                          | 1.5                                      | 186 ± 57.4                                                |
| Scallops (SF)                                    | Mollusks, scallop (bay and sea), cooked, steamed              | 5634                          | 0.9                                      | 22                                                        |
| Sculpin liver (FL)                               | n/a                                                           |                               | 0                                        | 87.5 ± 86.4                                               |
| Sculpin muscle (FM)                              | Fish, sculpin, native, raw                                    | 5919                          | 0.1                                      | 231 ± 91.8                                                |
| Seal blubber (MM)                                | Game meat, native, ringed seal, blubber, boiled               | 5781                          | 4.1                                      | ~0                                                        |
| Seal liver (MM)                                  | Game meat, native, ringed seal, liver, raw                    | 5788                          | 2.0                                      | 175 ± 119                                                 |
| Seal kidney (MM)                                 | n/a                                                           |                               | 1.6                                      | 261 ± 74.5                                                |

<sup>a</sup> FL = fish liver; FM = fish muscle; FR = fish roe; MM = marine mammal; SF = shellfish.

<sup>b</sup> From Canada Nutrient File.

<sup>c</sup> Fraction of total per-capita calories from all locally caught traditional seafood (summer 2014).

<sup>d</sup> From Calder et al. (2016).

n/a: Data not available and values are calculated as average of other foods in same nutritional category.

Table S3 (cont'd): MeHg concentrations, dietary database information and per-capita caloric significance for locally caught traditional seafood

| Food name<br>(nutritional category) <sup>a</sup> | Name in nutritional database                                  | Database<br>code <sup>b</sup> | Baseline<br>calories<br>(%) <sup>c</sup> | MeHg<br>Mean $\pm$ SD<br>(ng g <sup>-1</sup> ww) <sup>d</sup> |
|--------------------------------------------------|---------------------------------------------------------------|-------------------------------|------------------------------------------|---------------------------------------------------------------|
| Seal muscle (MM)                                 | Game meat, native, ringed seal,<br>meat, boiled               | 5783                          | 5.1                                      | 172 $\pm$ 110                                                 |
| Smelt (FM)                                       | Fish, smelt, rainbow (American,<br>capelin), baked or broiled | 3065                          | 2.7                                      | 114 $\pm$ 49.2                                                |
| Whale blubber (MM)                               | Whale, bowhead, skin and<br>subcutaneous fat (muktuk)         | 35086*                        | 0.06                                     | ~0                                                            |
| Whale muscle (MM)                                | Game meat, whale, raw                                         | 3648                          | 0                                        | 75 $\pm$ 21                                                   |
| Wrinkles (SF)                                    | Pacific surf, cooked periwinkle<br>meat                       | 45002474*                     | 0.1                                      | 40                                                            |

<sup>a</sup> FM = fish muscle; MM = marine mammal; SF = shellfish.

<sup>b</sup> Codes with \* are from USDA Nutrient Database; other foods are from the Canada Nutrient File.

<sup>c</sup> Fraction of total per-capita calories from all locally caught traditional seafood (summer 2014).

<sup>d</sup> From Calder et al. (2016).

Table S4: MeHg concentrations, dietary database information and per-capita caloric significance for other locally caught traditional foods

| Food name<br>(nutritional category) <sup>a</sup> | Name in nutritional database                           | Database<br>code <sup>b</sup> | Baseline<br>calories<br>(%) <sup>c</sup> | MeHg<br>Mean ± SD<br>(ng g <sup>-1</sup> ww) <sup>d</sup> |
|--------------------------------------------------|--------------------------------------------------------|-------------------------------|------------------------------------------|-----------------------------------------------------------|
| Bakeapples (FR)                                  | Cloudberry (bakeapple), native                         | 5939                          | 9.42                                     | ~0                                                        |
| Black bear (TM)                                  | Game meat, native, bear, simmered                      | 3566                          | 0.9                                      | ~0                                                        |
| Caribou (TM)                                     | Game meat, native, caribou<br>(reindeer), meat, cooked | 3578                          | 7.7                                      | ~0                                                        |
| Duck eggs (EG)                                   | Egg, duck, whole, fresh, raw                           | 1138*                         | 1.7                                      | 30 ± 3                                                    |
| Duck muscle (FP)                                 | Duck, wild, native, cooked                             | 5931                          | 5.4                                      | 117 ± 75.7                                                |
| Eider muscle (FP)                                | n/a                                                    |                               | 2.3                                      | 113 ± 33                                                  |
| Goose muscle (FP)                                | Goose, domesticated, meat only,<br>roasted             | 672                           | 12.5                                     | ~0                                                        |
| Guillemot eggs (EG)                              | n/a                                                    |                               | 0                                        | 210 ± 9.59                                                |
| Guillemot muscle (FP)                            | n/a                                                    |                               | 0.17                                     | 270 ± 70                                                  |
| Gull eggs (EG)                                   | n/a                                                    |                               | 3.6                                      | 59.5 ± 7.84                                               |
| Gull muscle (FP)                                 | n/a                                                    |                               | 0.01                                     | 230 ± 27.1                                                |
| Labrador tea (FR)                                | n/a                                                    |                               | 0.06                                     | ~0                                                        |
| Loon eggs (EG)                                   | n/a                                                    |                               | 0.03                                     | 900 ± 1,880                                               |
| Loon muscle (FP)                                 | n/a                                                    |                               | 0                                        | 846 ± 237                                                 |
| Moose (TM)                                       | Game meat, native, moose, roasted                      | 3588                          | 9.2                                      | ~0                                                        |
| Okalik/Hare (TM)                                 | Game meat, native, rabbit, wild,<br>cooked             | 3596                          | 0.4                                      | ~0                                                        |
| Owl muscle (FP)                                  | n/a                                                    |                               | 0.01                                     | ~0                                                        |
| Partridge muscle (FP)                            | Spruce grouse, native, meat, cooked                    |                               | 10.5                                     | ~0                                                        |
| Polar bear meat<br>(TM)                          | Game meat, native, polar bear, meat,<br>boiled         | 5834                          | 0.03                                     | 70 ± 50                                                   |
| Rabbit (TM)                                      | Game meat, native, rabbit, wild,<br>cooked             | 3596                          | 2.3                                      | ~0                                                        |
| Red berries (FR)                                 | n/a                                                    |                               | 12                                       | ~0                                                        |
| Sandpiper (FP)                                   | n/a                                                    |                               | 0.4                                      | 70 ± 7                                                    |
| Snowbird (FP)                                    | n/a                                                    |                               | 0                                        | ~0                                                        |
| Tern eggs (EG)                                   | n/a                                                    |                               | 1.2                                      | 424 ± 107                                                 |
| Tern muscle (FP)                                 | n/a                                                    |                               | 0.23                                     | 233 ± 246                                                 |
| Wild blackberries (FR)                           | Blackberry, raw                                        |                               | 1.1                                      | ~0                                                        |
| Wild blueberries (FR)                            | Blueberry, raw                                         |                               | 10.2                                     | ~0                                                        |
| Wild raspberries (FR)                            | Raspberry, wild, raw                                   |                               | 5.6                                      | ~0                                                        |
| Other picked berries (FR)                        | n/a                                                    |                               | 2.2                                      | ~0                                                        |
| Other wild plants (FR)                           | n/a                                                    |                               | 0.6                                      | ~0                                                        |

<sup>a</sup> EG = egg; FR = fruit; FP = fowl/poultry; TM = terrestrial mammal; FR = fruit.

<sup>b</sup> Codes with \* are from USDA Nutrient Database; other foods are from the Canada Nutrient File.

<sup>c</sup> Fraction of total per-capita calories from all other locally caught food (summer 2014).

<sup>d</sup> From Calder et al. (2016).

n/a: Data not available and values are calculated as average of other foods in same nutritional category.

Table S5: MeHg concentrations, dietary database information and per-capita caloric significance for store-bought seafood

| Food name<br>(nutritional<br>category) <sup>a</sup> | Name in nutritional database                                               | Database<br>code <sup>b</sup> | Baseline<br>calories<br>(%) <sup>c</sup> | MeHg<br>Mean ± SD<br>(ng g <sup>-1</sup> ww) <sup>d</sup> |
|-----------------------------------------------------|----------------------------------------------------------------------------|-------------------------------|------------------------------------------|-----------------------------------------------------------|
| Battered cod<br>(FM)                                | Sea Cuisine, breaded cod tender flaky fillets                              | 4511–<br>9629*                | 11.5                                     | 110.0 ± 64.7                                              |
| Battered haddock<br>(FM)                            | Gorton's, haddock breaded fish sticks                                      | 4504–<br>5406*                | 0.9                                      | 59.1 ± 26.9                                               |
| Brook trout (FM)                                    | Fish, trout, brook, raw                                                    | 7234                          | 0.6                                      | 87.9 ± 41.0                                               |
| Canned oysters<br>(SF)                              | Mollusks, oyster, eastern (blue point), wild,<br>canned, solids and liquid | 3121                          | 0.7                                      | 2.6 ± 2.9                                                 |
| Canned salmon<br>(FM)                               | Fish, salmon, chum (keta), canned, drained,<br>solids with bone, salted    | 3218                          | 3.7                                      | 40.0 ± 19.5                                               |
| Canned tuna (FM)                                    | Fish, tuna, light, canned in water, drained,<br>unsalted                   | 3131                          | 13.1                                     | 162.4 ±<br>136.8                                          |
| Catfish (FM)                                        | Fish, catfish (wolffish), Atlantic, baked or<br>broiled                    | 3170                          | 0                                        | 40.1 ± 19.0                                               |
| Clams (SF)                                          | Mollusks, clam, mixed species, boiled or<br>steamed                        | 3111                          | 1.5                                      | 10.0 ± 2.0                                                |
| Crab (SF)                                           | Crustaceans, crab, red, steamed                                            | 3238                          | 3.1                                      | 60.1 ± 27.0                                               |
| Fish sticks<br>(pollock) (FM)                       | Fish, fish sticks, frozen, prepared                                        | 3006                          | 3.7                                      | 18.7 ± 10.9                                               |
| Fresh cod (FM)                                      | Fish, cod (scrod), Atlantic, baked or broiled                              | 3195                          | 18.3                                     | 110.9 ± 66.0                                              |
| Fresh pollock<br>(FM)                               | Fish, pollock, Atlantic (Boston blue), baked<br>or broiled                 | 3152                          | 1.5                                      | 19.0 ± 10.6                                               |
| Fresh tuna (FM)                                     | Fish, tuna, skipjack (aku), baked or broiled                               | 3166                          | 1.2                                      | 440.1 ±<br>246.1                                          |
| Herring (FM)                                        | Fish, herring, Atlantic, baked or broiled                                  | 3015                          | 3.0                                      | 18.0 ± 10.2                                               |
| Lobster (SF)                                        | Crustaceans, lobster, American (northern),<br>boiled or steamed            | 3210                          | 3.4                                      | 36.0 ± 16.9                                               |
| Mussels (SF)                                        | Mollusks, mussel, blue, boiled or steamed                                  | 3116                          | 8.7                                      | 24.0 ± 12.5                                               |
| Rainbow trout<br>(FM)                               | Fish, trout, rainbow, farmed, baked or<br>broiled                          | 3187                          | 0.9                                      | 34.0 ± 17.5                                               |
| Salmon (FM)                                         | Fish, salmon, Atlantic, wild, baked or<br>broiled                          | 3156                          | 8.7                                      | 42.0 ± 19.8                                               |
| Sardines (FM)                                       | Fish, sardine, Atlantic, canned in oil, drained<br>solids with bone        | 3203                          | 5.0                                      | 34.9 ± 17.5                                               |
| Scallops (SF)                                       | Mollusks, scallop (bay and sea), cooked,<br>steamed                        | 5634                          | 4.7                                      | 22.1 ± 12.1                                               |
| Shrimp (SF)                                         | Crustaceans, shrimp, mixed species, boiled<br>or steamed                   | 3212                          | 5.9                                      | 30.9 ± 15.7                                               |
| Skate (FM)                                          | n/a                                                                        |                               | 0                                        | 118 ± 50.7                                                |
| Sole (FM)                                           | Fish, flatfish (flounder or sole or plaice),<br>baked or broiled           | 3007                          | 0.05                                     | 101.3 ± 39.8                                              |
| Tilapia (FM)                                        | Fish, tilapia, baked or broiled                                            | 5697                          | 0.1                                      | 20.1 ± 10.8                                               |

<sup>a</sup> FM = fish muscle; SF = shellfish.

<sup>b</sup> Codes with \* are from USDA Nutrient Database. Other foods are from the Canada Nutrient File.

<sup>c</sup> Fraction of total per-capita calories from all store-bought seafood (summer 2014).

<sup>d</sup> From Calder et al. (2016).

n/a: Data not available and values are calculated as average of other foods in same nutritional category.



## Supplemental methods for dietary survey

### *Food frequency questionnaire design*

We designed the food frequency questionnaire (FFQ) in collaboration with a committee of Inuit elders convened by the Nunatsiavut Government (NG). Through this collaborative process, we developed an exhaustive list of traditional foods eaten by Labrador Inuit. We also explored the feasibility of different ways of measuring food intake (recall, journals, etc.). It was decided that a self-reported recall instrument administered by trained interviewers was likely to maximize enrollment and consistency of results.

We designed standardized clay models for participants to use to describe their average serving size of each food they reported eating. These models corresponded to serving sizes ranging between approximately 115 and 290 g.

### *Participant recruitment*

The NG enrolled participants in the study through bilingual (English/Inuktitut) informational posters dispersed through the communities, informational sessions organized by staff from the NG Environmental Division and informational phone calls to community members registered as NG 'beneficiaries' (Inuit with a demonstrated connection to the Labrador Inuit Land Claims Area). Participants were entered into two raffles for three prizes each ranging from 250 to 1,000 CAD to incentivize 1) participation in all three survey periods ( $n = 147$ ) and 2) participating in the larger-scale summer period ( $n = 1,054$ ).

### *Hair Hg analysis*

Trained research assistants collected hair samples from all willing participants in the Spring and Summer survey periods. Hair was collected from the occipital region of the scalp and we analyzed the 2 cm proximal ends of each sample for total Hg as an indicator of MeHg exposure over the past two to three months. The analytical procedure for total mercury used thermal decomposition, amalgamation, and atomic absorption spectrophotometry following US EPA method 7473 on a Nippon MA-3000 or Milestone DMA-80 at Harvard University. One method blank and one sample containing certified hair reference material were tested every 10 samples and all recoveries were within certified ranges. The mean relative standard deviation of replicate samples was 8.6%.

Table S6: Dietary database information and per-capita caloric significance for store-bought nutritious foods

| Food name<br>(nutritional category) <sup>a</sup>                                                                                 | Name in nutritional<br>database                              | Database<br>code <sup>b</sup> | Baseline<br>calories<br>(%) <sup>c</sup> | Retail and<br>consumer<br>waste (%) <sup>d</sup> |
|----------------------------------------------------------------------------------------------------------------------------------|--------------------------------------------------------------|-------------------------------|------------------------------------------|--------------------------------------------------|
| All fresh fruits (FR)                                                                                                            | Apple, Gala, raw,<br>with skin                               | 7216                          | 6.1                                      | 40                                               |
| All frozen fruits (FR)                                                                                                           | Blueberry, frozen,<br>unsweetened                            | 1706                          | 0.04                                     | 0                                                |
| All fresh vegetables, except whole<br>pumpkins (VE)                                                                              | Brussels sprouts,<br>boiled, drained                         | 2379                          | 4.8                                      | 40                                               |
| All frozen vegetables (excluding French<br>fries, etc.) (VE)                                                                     | Broccoli, frozen,<br>chopped, boiled,<br>drained             | 2377                          | 0.08                                     | 0                                                |
| All-purpose flour, whole-wheat flour, rye<br>flour and other semi-perishable flours<br>(except cake flour and pastry flour) (GR) | Grains, wheat flour,<br>white, all purpose,<br>bleached      | 4501                          | 0                                        | 29                                               |
| Bacon (PM)                                                                                                                       | Pork, cured, back<br>bacon, pan-fried                        | 7219                          | 4.8                                      | 15                                               |
| Bread (except garlic bread) (GR)                                                                                                 | Bread, white,<br>commercial                                  | 4066                          | 8.3                                      | 29                                               |
| Bread products without filling or coating<br>(GR)                                                                                | English muffin,<br>wheat                                     | 3906                          | 2.9                                      | 29                                               |
| Butter (DA)                                                                                                                      | Butter, regular                                              | 118                           | 1.4                                      | 15.5                                             |
| Cheese (including block cheese,<br>shredded cheese and cottage cheese)<br>(DA)                                                   | Cheese, cheddar                                              | 119                           | 1.2                                      | 15.5                                             |
| Chocolate milk (DA)                                                                                                              | Milk, fluid,<br>chocolate, whole                             | 69                            | 1.7                                      | 15.5                                             |
| Combination foods (e.g., lasagna)                                                                                                | Lasagna with meat<br>and sauce, frozen                       | 5870                          | 0.5                                      | 0                                                |
| Cook-type cereals (e.g., oatmeal and<br>porridge) (GR)                                                                           | Cereal, hot, oats,<br>porridge                               | 1432                          | 0.03                                     | 29                                               |
| Cooking oils (e.g., canola, peanut, olive<br>and linseed)                                                                        | Vegetable oil, canola                                        | 451                           | 1.0                                      | 0                                                |
| Crackers, crisp bread, hard bread, Pilot<br>biscuits, Melba toast, arrow-root biscuits<br>and Social Tea biscuits (GR)           | Snacks, rice cakes,<br>crackers (include<br>mini rice cakes) | 5493                          | 1.1                                      | 29                                               |

<sup>a</sup> Food name/category from the Nutrition North program; FM = FR = fruit; VE = vegetables; GR = grains; PM = processed meat; DA = dairy.

<sup>b</sup> From the Canada Nutrient File.

<sup>c</sup> Fraction of total per-capita calories from all store-bought nutritious foods (summer 2014).

<sup>d</sup> From Gustavsson et al. (2011).

Table S6 (cont'd): MeHg concentrations, dietary database information and per-capita caloric significance for store-bought nutritious foods

| Food name<br>(nutritional category) <sup>a</sup>                                                                                 | Name in nutritional database                                                         | Database<br>code <sup>b</sup> | Baseline<br>calories<br>(%) <sup>c</sup> | Retail and<br>consumer<br>waste (%) <sup>d</sup> |
|----------------------------------------------------------------------------------------------------------------------------------|--------------------------------------------------------------------------------------|-------------------------------|------------------------------------------|--------------------------------------------------|
| Cream, sour cream, cream cheese<br>(DA)                                                                                          | Cream, sour, cultured, 18%<br>M.F.                                                   | 152                           | 1.2                                      | 15.5                                             |
| Dried fruits (e.g., grapes, dates,<br>cranberries and apricots) (FR)                                                             | Apple, dried, sulphured,<br>uncooked                                                 | 1490                          | 0.2                                      | 67.2                                             |
| Eggs and egg substitutes (EG)                                                                                                    | Egg, chicken, whole, fresh or<br>frozen, raw                                         | 125                           | 4.4                                      | 15                                               |
| Enriched soy milk                                                                                                                | Plant-based beverage, soy,<br>enriched, all flavours                                 | 6720                          | 0.2                                      | 15.5                                             |
| Fresh and frozen meat other than<br>side bacon and products that are<br>breaded, battered or in pastry (RM)                      | Beef, ground, lean, raw                                                              | 2683                          | 21.7                                     | 15                                               |
| Fresh and frozen pasta (except<br>combined foods containing pasta)<br>(GR)                                                       | Pasta, fresh-refrigerated,<br>plain, as purchased                                    | 4502                          | 0                                        | 29                                               |
| Fresh and frozen pizzas                                                                                                          | Fast foods, pizza, cheese,<br>meat and vegetable, regular<br>crust, frozen, cooked   | 5862                          | 4.9                                      | 0                                                |
| Fresh and frozen poultry e.g.,<br>chicken, turkey, goose) other than<br>products that are breaded, battered<br>or in pastry (FP) | Chicken, broiler, breast,<br>skinless, boneless, meat,<br>grilled                    | 7322                          | 5.8                                      | 15                                               |
| Fresh and frozen seafood, other<br>than products that are breaded,<br>battered or in a pie crust (FM)                            | Fish, tuna, white, canned with<br>water, drained, salted                             | 3084                          | Counted<br>in Table<br>S4                | n/a                                              |
| Fresh milk (DA)                                                                                                                  | Milk, fluid, partly skimmed,<br>2% M.F.                                              | 61                            | 2.6 <sup>e</sup>                         | 15.5                                             |
| Frozen French fries, home fries and<br>similar potato-based products                                                             | Potato, french-fried, frozen,<br>shoestring, heated in oven                          | 6517                          | 5.3                                      | 0                                                |
| Ice cream, iced milk, iced yogourt<br>and sorbet (DA)                                                                            | Dessert, frozen, ice cream,<br>chocolate                                             | 4288                          | 2.6 <sup>g</sup>                         | 15.5                                             |
| Individually wrapped unsweetened<br>juice (all sizes)                                                                            | Apple juice, canned or<br>bottled, unsweetened, calcium<br>and Vitamin C and D added | 7419                          | 0.8                                      | 0                                                |
| Lard and shortening                                                                                                              | Shortening, household,<br>unspecified vegetable and<br>animal oils                   | 539                           | 1.5                                      | 0                                                |

<sup>a</sup> Food name/category from the Nutrition North program; FM = FR = fruit; VE = vegetables; GR = grains; PM = processed meat; DA = dairy.

<sup>b</sup> From the Canada Nutrient File.

<sup>c</sup> Fraction of total per-capita calories from all store-bought nutritious foods (summer 2014).

<sup>d</sup> From Gustavsson et al. (2011).

Table S6 (cont'd): MeHg concentrations, dietary database information and per-capita caloric significance for store-bought nutritious foods

| Food name<br>(nutritional category) <sup>a</sup>                                                | Name in nutritional database                                | Database<br>code <sup>b</sup> | Baseline<br>calories<br>(%) <sup>c</sup> | Retail and<br>consumer<br>waste (%) <sup>d</sup> |
|-------------------------------------------------------------------------------------------------|-------------------------------------------------------------|-------------------------------|------------------------------------------|--------------------------------------------------|
| Margarine                                                                                       | Margarine, tub, hydrogenated,<br>canola oil                 | 7575                          | 1.5                                      | 0                                                |
| Melted cheese spreads (e.g.,<br>Cheez Whiz)                                                     | Kraft Cheez Whiz Pasteurized<br>Process Cheese Sauce        | 1188*                         | 0.04                                     | 0                                                |
| Peanut butter and other nut<br>butters                                                          | Peanut butter, natural                                      | 6289                          | 0.7                                      | 81.4                                             |
| Perishable dips                                                                                 | Dip, cream cheese base                                      | 6786                          | 0.5 <sup>f</sup>                         | 0                                                |
| Powdered and evaporated milk                                                                    | Milk, evaporated, whole, canned,<br>undiluted, 7.8% M.F.    | 140                           | 0.02                                     | 0                                                |
| Processed cheese (e.g.,<br>Velveeta)                                                            | Kraft Velveeta Pasteurized<br>Process Cheese Spread         | 1191*                         | 1.8                                      | 0                                                |
| Ready-to-eat breakfast cereals<br>(GR)                                                          | Cereal, ready to eat, Life, Quaker                          | 1258                          | 0.8                                      | 29                                               |
| Salad dressing and mayonnaise                                                                   | Salad dressing, mayonnaise type,<br>commercial, regular     | 527                           | 1.3                                      | 0                                                |
| Tofu and other vegetable-based<br>meat substitutes (e.g., vegetable<br>patties and nut burgers) | Tofu, silken, firm                                          | 4911                          | 0                                        | 0                                                |
| UHT milk (DA)                                                                                   | Milk, fluid, whole, pasteurized,<br>homogenized, 3.25% M.F. | 113                           | 1.0 <sup>h</sup>                         | 15.5                                             |
| Unsweetened nuts and grains<br>(GR)                                                             | Nuts, mixed nuts, dry roasted<br>with peanuts               | 2577                          | 0.6                                      | 0                                                |
| Yogurt and yogurt drinks (DA)                                                                   | Yogourt, plain (2-3.9% M.F.)                                | 6961                          | 1.3 <sup>f</sup>                         | 15.5                                             |

<sup>a</sup> Food name/category from the Nutrition North program; GR = grains; DA = dairy.

<sup>b</sup> From the Canada Nutrient File.

<sup>c</sup> Fraction of total per-capita calories from all store-bought nutritious foods (summer 2014).

<sup>d</sup> From Gustavsson et al. (2011).

Table S7: Probability distribution of peak MeHg concentrations in locally caught traditional foods following upstream hydroelectric development, first reported by Calder et al. (2016)

| Species          | Expected mean | 75 <sup>th</sup> percentile | 90 <sup>th</sup> percentile | 95 <sup>th</sup> percentile |
|------------------|---------------|-----------------------------|-----------------------------|-----------------------------|
| Arctic char      |               |                             |                             |                             |
| Muscle           | 0.41          | 0.51                        | 0.78                        | 1.0                         |
| Liver            | 0.49          | 0.58                        | 0.70                        | 0.80                        |
| Roe              | 0.05          | 0.06                        | 0.07                        | 0.08                        |
| Atlantic cod     | 0.41          | 0.50                        | 0.65                        | 0.76                        |
| Atlantic salmon  |               |                             |                             |                             |
| Muscle           | 0.16          | 0.20                        | 0.25                        | 0.29                        |
| Liver            | 0.20          | 0.23                        | 0.28                        | 0.31                        |
| Roe              | 0.020         | 0.023                       | 0.027                       | 0.031                       |
| Black duck       |               |                             |                             |                             |
| Muscle           | 0.44          | 0.55                        | 0.83                        | 1.1                         |
| Eggs             | 0.11          | 0.13                        | 0.16                        | 0.18                        |
| Brook trout      |               |                             |                             |                             |
| Muscle           | 0.68          | 0.84                        | 1.1                         | 1.3                         |
| Liver            | 0.62          | 0.76                        | 1.0                         | 1.2                         |
| Roe              | 0.34          | 0.42                        | 0.58                        | 0.70                        |
| Capelin          |               |                             |                             |                             |
| Muscle           | 0.04          | 0.05                        | 0.06                        | 0.07                        |
| Roe              | 0.01          | 0.01                        | 0.01                        | 0.01                        |
| Clams            | 0.03          | 0.03                        | 0.04                        | 0.04                        |
| Eider            |               |                             |                             |                             |
| Muscle           | 0.20          | 0.24                        | 0.30                        | 0.34                        |
| Flatfish         | 0.17          | 0.22                        | 0.32                        | 0.40                        |
| Green sea urchin | 0.10          | 0.12                        | 0.14                        | 0.16                        |
| Guillemot        |               |                             |                             |                             |
| Muscle           | 0.68          | 0.82                        | 1.0                         | 1.2                         |
| Eggs             | 0.53          | 0.61                        | 0.74                        | 0.84                        |
| Gull             |               |                             |                             |                             |
| Muscle           | 0.41          | 0.46                        | 0.54                        | 0.59                        |
| Eggs             | 0.15          | 0.18                        | 0.21                        | 0.24                        |
| Lake trout       | 1.0           | 1.3                         | 1.8                         | 2.2                         |
| Loon             |               |                             |                             |                             |
| Eggs             | 5.6           | 5.7                         | 13.3                        | 20.9                        |
| Minke whale      | 0.07          | 0.09                        | 0.10                        | 0.11                        |
| Mussels          | 0.01          | 0.01                        | 0.01                        | 0.01                        |
| Ouananiche       | 1.5           | 1.9                         | 3.0                         | 3.9                         |
| Periwinkles      | 0.10          | 0.12                        | 0.14                        | 0.16                        |
| Porpoise         |               |                             |                             |                             |
| Muscle           | 1.4           | 1.8                         | 2.7                         | 3.5                         |
| Liver            | 2.8           | 3.6                         | 5.2                         | 6.8                         |
| Rock cod         |               |                             |                             |                             |
| Muscle           | 0.42          | 0.50                        | 0.65                        | 0.77                        |
| Liver            | 0.50          | 0.58                        | 0.70                        | 0.79                        |

Table S8 (cont'd): Probability distribution of peak MeHg concentrations in locally caught traditional foods following upstream hydroelectric development, first reported by Calder et al. (2016)

| Species  | Expected mean | 75 <sup>th</sup> percentile | 90 <sup>th</sup> percentile | 95 <sup>th</sup> percentile |
|----------|---------------|-----------------------------|-----------------------------|-----------------------------|
| Scallops | 0.06          | 0.07                        | 0.08                        | 0.09                        |
| Sculpin  |               |                             |                             |                             |
| Muscle   | 0.54          | 0.66                        | 0.88                        | 1.0                         |
| Liver    | 0.20          | 0.24                        | 0.42                        | 0.58                        |
| Seal     |               |                             |                             |                             |
| Muscle   | 0.66          | 0.82                        | 1.3                         | 1.6                         |
| Liver    | 0.67          | 0.84                        | 1.3                         | 1.7                         |
| Kidney   | 1.0           | 1.2                         | 1.6                         | 1.9                         |
| Smelt    | 0.29          | 0.36                        | 0.48                        | 0.58                        |
| Tern     | 0.41          | 0.50                        | 0.86                        | 1.2                         |

### Derivation of dose-response functions for cardiovascular and cancer risks

Overall relative risks for cardiovascular and cancer death for each scenario are calculated as the product of individual relative risk equations developed based on dose-response information from the literature. This is presented in Equation S1 where  $RR$  is the relative risk for cancer or cardiovascular death ( $i$ ) for all individual nutrients, foods and contaminants ( $j$ ) considered and presented in Tables 2 and 3 in the main text.

$$RR_i = \prod_{j=1}^n RR_{ij} \quad [S1]$$

Cause-specific relative risks of cancer or cardiovascular death ( $i$ ) are calculated as a function of the change in dose ( $\Delta$ ) in nutrient, food or contaminant ( $j$ ) in model dietary scenarios based on the relative risk calculated using the dose-response information the literature, scaling according to the magnitude of the dose of the substitution in the dietary model vs. the dose considered in the literature (Equation S2).

$$RR_{ij} = \exp\left(\log(RR_{ij}^{lit}) \times \frac{\Delta_j^{model}}{\Delta_j^{lit}}\right) \quad [S2]$$

Dose-response information in the literature is often presented for specific causes of mortality (e.g., relative risk of death from ischemic stroke or from pancreatic cancer) ( $k$ ). To express this in terms of relative risk of overall mortality (e.g., relative risk of cardiovascular death or cancer death) ( $i$ ), we consider the fraction at baseline of more general mortality associated with the more specific causes of death ( $f$ ) for which dose-response information is available, according to Equation S3.

$$RR_{ij}^{lit} = 1 + \left(f_{ik}(RR_{kj}^{lit} - 1)\right) \quad [S3]$$

Tables 2 and 3 in the main text present values for  $RR_{jk}^{lit}$ ,  $f_{ik}$  and  $\Delta_j^{lit}$  for cardiovascular and cancer dose-response functions, respectively.

Table S8: Summary statistics for modeled population-wide MeHg exposures

| Demographic Group      | MeHg exposure percentiles<br>( $\mu\text{g kg}^{-1} \text{ day}^{-1}$ ) |                  |                  |                  | Fraction of population exceeding<br>threshold                |                                    |
|------------------------|-------------------------------------------------------------------------|------------------|------------------|------------------|--------------------------------------------------------------|------------------------------------|
|                        | 50 <sup>th</sup><br>(median)                                            | 90 <sup>th</sup> | 95 <sup>th</sup> | 99 <sup>th</sup> | US EPA RfD<br>( $0.1 \mu\text{g kg}^{-1} \text{ day}^{-1}$ ) | Health Canada<br>pTDI <sup>a</sup> |
| <i>Winter 2014</i>     |                                                                         |                  |                  |                  |                                                              |                                    |
| All individuals        | 0.03                                                                    | 0.11             | 0.14             | 0.22             | 10.45%                                                       | 1.24%                              |
| <i>Spring 2014</i>     |                                                                         |                  |                  |                  |                                                              |                                    |
| All individuals        | 0.01                                                                    | 0.05             | 0.09             | 0.16             | 4.29%                                                        | 0.02%                              |
| <i>Summer 2014</i>     |                                                                         |                  |                  |                  |                                                              |                                    |
| All individuals        | 0.02                                                                    | 0.08             | 0.12             | 0.26             | 6.85%                                                        | 0.89%                              |
| <u>Communities</u>     |                                                                         |                  |                  |                  |                                                              |                                    |
| Happy Valley-Goose Bay | 0.02                                                                    | 0.07             | 0.09             | 0.21             | 4.88%                                                        | 0.71%                              |
| North West River       | 0.02                                                                    | 0.07             | 0.09             | 0.19             | 3.90%                                                        | 0%                                 |
| Rigolet                | 0.05                                                                    | 0.2              | 0.27             | 0.5              | 24.38%                                                       | 3.14%                              |
| <u>Males</u>           |                                                                         |                  |                  |                  |                                                              |                                    |
| All males              | 0.02                                                                    | 0.1              | 0.16             | 0.36             | 10.35%                                                       | 1.35%                              |
| M 0–17                 | 0.01                                                                    | 0.07             | 0.21             | 0.31             | 7.93%                                                        | 3.68%                              |
| M 18–44                | 0.02                                                                    | 0.07             | 0.11             | 0.21             | 5.82%                                                        | 0.15%                              |
| M 45–64                | 0.03                                                                    | 0.12             | 0.18             | 0.62             | 13.40%                                                       | 1.42%                              |
| M $\geq 65$            | 0.04                                                                    | 0.2              | 0.23             | 0.37             | 23.28%                                                       | 0.36%                              |
| <u>Females</u>         |                                                                         |                  |                  |                  |                                                              |                                    |
| All females            | 0.02                                                                    | 0.06             | 0.08             | 0.14             | 3.42%                                                        | 0.44%                              |
| F 0–17                 | 0.01                                                                    | 0.06             | 0.09             | 0.17             | 4.70%                                                        | 0.58%                              |
| F 18–44                | 0.01                                                                    | 0.04             | 0.06             | 0.16             | 2.28%                                                        | 0.55%                              |
| F 45–64                | 0.02                                                                    | 0.06             | 0.07             | 0.13             | 2.87%                                                        | 0.31%                              |
| F $\geq 65$            | 0.03                                                                    | 0.09             | 0.1              | 0.16             | 6.93%                                                        | 0%                                 |

<sup>a</sup> Tolerable daily intake =  $0.2 \mu\text{g kg}^{-1} \text{ day}^{-1}$  for women of childbearing age and children 12 and under;  $0.47 \mu\text{g kg}^{-1} \text{ day}^{-1}$  for others (Health Canada 2004; Health Canada 2007). Differences in the regulatory thresholds used by these two agencies mainly reflects variability in the uncertainty factor used to account for exposures of sensitive groups.<sup>26</sup> During the establishment of the RfD for MeHg by the U.S. EPA in 2000, it was acknowledged that, “It is also important to note that no evidence of a threshold arose for methylmercury-related neurotoxicity within the range of exposures in the Faroe Islands study.”<sup>16</sup> A variety of epidemiological studies have since noted effects associated with exposures below the U.S. EPA’s RfD.<sup>90,91</sup>



(a) Individuals with MeHg exposures  $\geq$  90th percentile

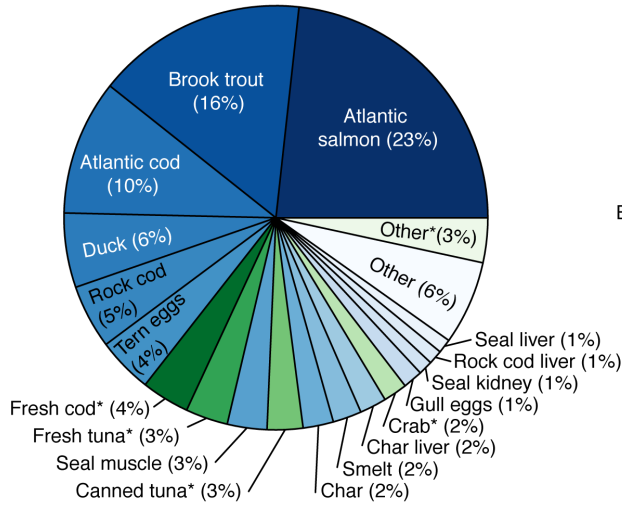

(b) All individuals – Happy Valley – Goose Bay

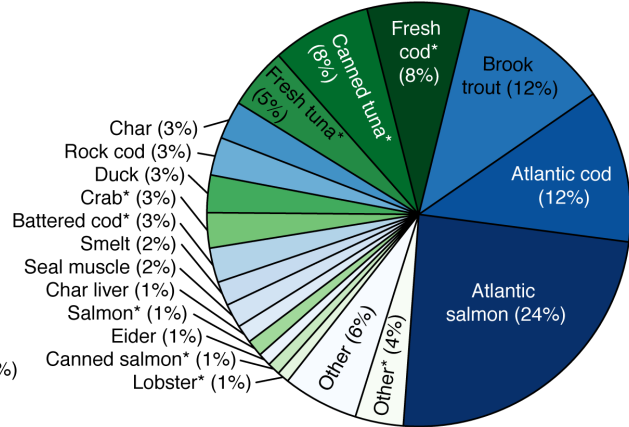

(c) All individuals – North West River

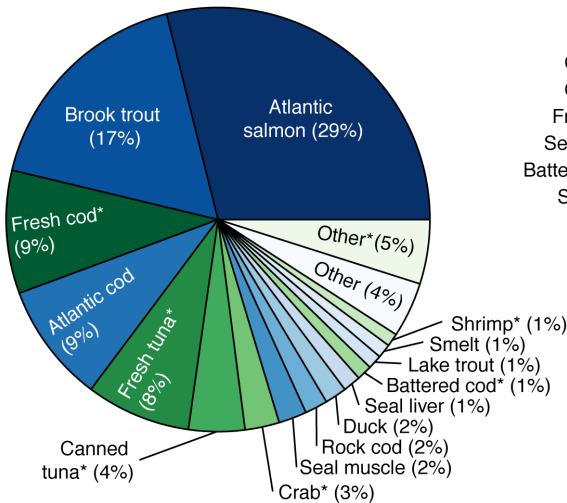

(d) All individuals – Rigolet

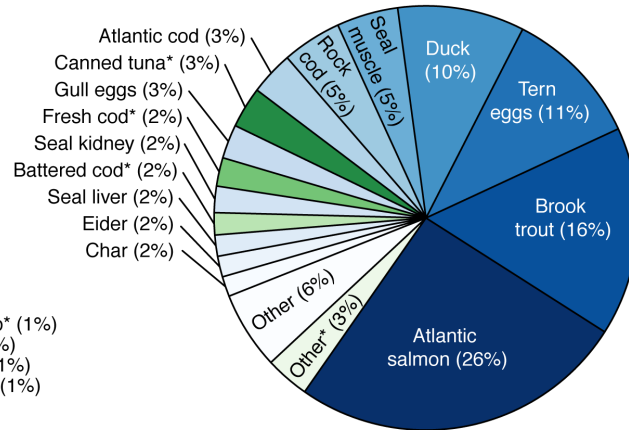

Figure S2: Sources of per-capita MeHg intakes among Lake Melville Inuit for individuals in all three communities with MeHg exposures  $\geq$  90<sup>th</sup> percentile (a) and for all individuals in each community (b, c, d), Summer 2014. Foods in blue are locally caught. Foods in green with \* are store-bought. Rock cod is the local name for *Gadus ogac* (Greenland cod).

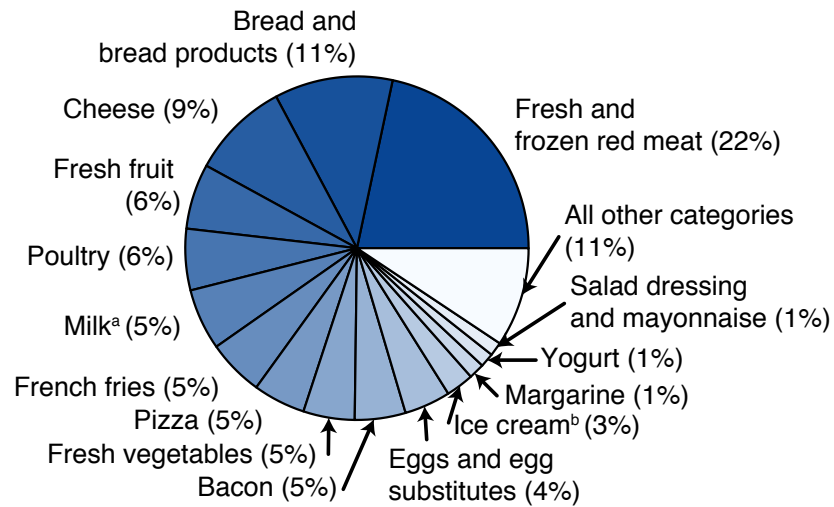

Figure S3: Main categories of store-bought nutritious foods as a fraction of total store-bought nutritious food intake at present day (by calories). <sup>a</sup> Includes soy, evaporated, powdered and chocolate milk. <sup>b</sup> Includes iced yogurt, iced milk and sorbet.

Table S9: Traditional food intake by season and demographic group

| Demographic Group      | Traditional food intake percentiles (g day <sup>-1</sup> ) |                  |                  |                  |                  |                  |
|------------------------|------------------------------------------------------------|------------------|------------------|------------------|------------------|------------------|
|                        | 25 <sup>th</sup>                                           | 50 <sup>th</sup> | 75 <sup>th</sup> | 90 <sup>th</sup> | 95 <sup>th</sup> | 99 <sup>th</sup> |
| <i>Winter 2014</i>     |                                                            |                  |                  |                  |                  |                  |
| All individuals        | 8.5                                                        | 21.14            | 47.68            | 115.49           | 160.55           | 209.96           |
| <i>Spring 2014</i>     |                                                            |                  |                  |                  |                  |                  |
| All individuals        | 5.14                                                       | 11.62            | 29.79            | 77.83            | 125.95           | 229.23           |
| <i>Summer 2014</i>     |                                                            |                  |                  |                  |                  |                  |
| All individuals        | 6.86                                                       | 17.24            | 41.07            | 93.22            | 139.45           | 276.3            |
| <u>Communities</u>     |                                                            |                  |                  |                  |                  |                  |
| Happy Valley-Goose Bay | 6.38                                                       | 14.11            | 33.5             | 85.8             | 121.8            | 237.25           |
| North West River       | 10.38                                                      | 21.96            | 41.06            | 87.79            | 127.48           | 183.57           |
| Rigolet                | 16.8                                                       | 41.32            | 91.96            | 180.04           | 226.56           | 421.92           |
| <u>Males</u>           |                                                            |                  |                  |                  |                  |                  |
| All males              | 8.63                                                       | 19.49            | 50.54            | 109.5            | 163.76           | 410.13           |
| M 0–17                 | 2.24                                                       | 6.61             | 19.38            | 70.39            | 85.8             | 309.93           |
| M 18–44                | 8.63                                                       | 16.18            | 36.98            | 86.53            | 109.5            | 194.3            |
| M 45–64                | 19.1                                                       | 36.21            | 80.87            | 156.55           | 237.25           | 434.33           |
| M ≥65                  | 27.48                                                      | 49.99            | 107.67           | 209.35           | 216.81           | 306.92           |
| <u>Females</u>         |                                                            |                  |                  |                  |                  |                  |
| All females            | 6.61                                                       | 14.06            | 30.28            | 82.14            | 110.5            | 173.09           |
| F 0–17                 | 4.39                                                       | 6.84             | 14.19            | 42.53            | 82.14            | 117.07           |
| F 18–44                | 6.37                                                       | 11.56            | 25.42            | 56.77            | 99.21            | 146.18           |
| F 45–64                | 10.94                                                      | 20.45            | 45.02            | 90.94            | 130.84           | 189.08           |
| F ≥65                  | 16.77                                                      | 32.73            | 74.48            | 136.98           | 196.34           | 230.9            |

Table S10: Modeled neurodevelopmental impacts (change in IQ, prenatal exposures, based on Summer 2014)<sup>a</sup>

| Demographic Group      | Baseline diet, increased MeHg | Replacement of traditional foods |               |                |              |             |
|------------------------|-------------------------------|----------------------------------|---------------|----------------|--------------|-------------|
|                        |                               | Nutritious <sup>b</sup>          | Empty-calorie | Processed meat | Vegetables   | Atl. salmon |
| All individuals        | -0.06 (0.04)                  | -0.01 (0.02)                     | -0.01 (0.02)  | -0.01 (0.02)   | -0.01 (0.02) | 0.08 (0.02) |
| <b>Communities</b>     |                               |                                  |               |                |              |             |
| Happy Valley-Goose Bay | -0.05 (0.03)                  | -0.01 (0.01)                     | -0.01 (0.01)  | -0.01 (0.01)   | -0.01 (0.01) | 0.08 (0.01) |
| North West River       | -0.05 (0.03)                  | -0.01 (0.01)                     | -0.01 (0.01)  | -0.01 (0.01)   | -0.01 (0.01) | 0.1 (0.02)  |
| Rigolet                | -0.29 (0.18)                  | -0.04 (0.05)                     | -0.04 (0.05)  | -0.04 (0.05)   | -0.04 (0.05) | 0.31 (0.06) |

<sup>a</sup> Values presented are the modeled expected mean (SD) of medians for the whole population and for each community among women of childbearing age (16–49).

<sup>b</sup> Representative basket of nutritious store-bought foods (SI Figure S2).

Table S11: Modeled cardiovascular impacts (relative risk of cardiovascular mortality)<sup>a</sup>

| Demographic Group      | Baseline diet, increased MeHg | Replacement of traditional foods with store-bought alternatives |                |                |                |                |
|------------------------|-------------------------------|-----------------------------------------------------------------|----------------|----------------|----------------|----------------|
|                        |                               | Nutritious foods <sup>b</sup>                                   | Empty-calorie  | Processed meat | Vegetables     | Atl. salmon    |
| All individuals        | 1.02<br>(0.01)                | 1.12<br>(0.05)                                                  | 1.12<br>(0.05) | 1.19<br>(0.06) | 1.08<br>(0.05) | 0.88<br>(0.04) |
| <u>Communities</u>     |                               |                                                                 |                |                |                |                |
| Happy Valley-Goose Bay | 1.02<br>(0.01)                | 1.1<br>(0.04)                                                   | 1.1<br>(0.04)  | 1.14<br>(0.05) | 1.07<br>(0.04) | 0.9<br>(0.04)  |
| North West River       | 1.03<br>(0.02)                | 1.15<br>(0.07)                                                  | 1.16<br>(0.07) | 1.25<br>(0.09) | 1.12<br>(0.07) | 0.85<br>(0.05) |
| Rigolet                | 1.12<br>(0.07)                | 1.28<br>(0.14)                                                  | 1.3<br>(0.14)  | 1.54<br>(0.21) | 1.2<br>(0.14)  | 0.68<br>(0.09) |
| <u>Males</u>           |                               |                                                                 |                |                |                |                |
| All males              | 1.03<br>(0.02)                | 1.17<br>(0.07)                                                  | 1.17<br>(0.08) | 1.28<br>(0.1)  | 1.13<br>(0.08) | 0.82<br>(0.06) |
| M 25–44                | 1.02<br>(0.01)                | 1.09<br>(0.04)                                                  | 1.1<br>(0.04)  | 1.13<br>(0.04) | 1.05<br>(0.04) | 0.88<br>(0.04) |
| M 45–64                | 1.05<br>(0.02)                | 1.23<br>(0.1)                                                   | 1.23<br>(0.1)  | 1.35<br>(0.12) | 1.16<br>(0.1)  | 0.81<br>(0.06) |
| M ≥65                  | 1.07<br>(0.05)                | 1.27<br>(0.13)                                                  | 1.29<br>(0.14) | 1.53<br>(0.21) | 1.22<br>(0.13) | 0.74<br>(0.08) |
| <u>Females</u>         |                               |                                                                 |                |                |                |                |
| All females            | 1.02<br>(0.01)                | 1.08<br>(0.03)                                                  | 1.09<br>(0.04) | 1.14<br>(0.05) | 1.06<br>(0.04) | 0.91<br>(0.03) |
| F 25–44                | 1.01<br>(0)                   | 1.04<br>(0.01)                                                  | 1.04<br>(0.02) | 1.06<br>(0.02) | 1.02<br>(0.01) | 0.93<br>(0.02) |
| F 45–64                | 1.02<br>(0.01)                | 1.12<br>(0.05)                                                  | 1.12<br>(0.05) | 1.18<br>(0.06) | 1.09<br>(0.05) | 0.9<br>(0.04)  |
| F ≥65                  | 1.05<br>(0.03)                | 1.16<br>(0.07)                                                  | 1.17<br>(0.07) | 1.29<br>(0.11) | 1.11<br>(0.07) | 0.84<br>(0.06) |

<sup>a</sup> Values presented are the modeled expected mean (SD) of medians for the whole population and for each demographic group among individuals at least 25 years of age.

<sup>b</sup> Representative basket of nutritious store-bought foods (SI Figure S2).

Table S12: Modeled cancer impacts (relative risk of cancer mortality)<sup>a</sup>

| Demographic Group      | Replacement of traditional foods with store-bought alternatives |                  |                  |                  |                  |
|------------------------|-----------------------------------------------------------------|------------------|------------------|------------------|------------------|
|                        | Nutritious foods <sup>b</sup>                                   | Nutrient-sparse  | Processed meat   | Vegetables       | Atl. salmon      |
| All individuals        | 1.006<br>(0.002)                                                | 1.007<br>(0.002) | 1.009<br>(0.003) | 1.003<br>(0.002) | 0.995<br>(0.002) |
| <u>Communities</u>     |                                                                 |                  |                  |                  |                  |
| Happy Valley-Goose Bay | 1.005<br>(0.002)                                                | 1.006<br>(0.002) | 1.007<br>(0.002) | 1.002<br>(0.002) | 0.996<br>(0.001) |
| North West River       | 1.007<br>(0.003)                                                | 1.009<br>(0.003) | 1.012<br>(0.003) | 1.004<br>(0.003) | 0.995<br>(0.002) |
| Rigolet                | 1.017<br>(0.007)                                                | 1.019<br>(0.007) | 1.024<br>(0.007) | 1.011<br>(0.007) | 0.986<br>(0.005) |
| <u>Males</u>           |                                                                 |                  |                  |                  |                  |
| All males              | 1.009<br>(0.003)                                                | 1.01<br>(0.003)  | 1.013<br>(0.003) | 1.005<br>(0.004) | 0.994<br>(0.002) |
| M 25–44                | 1.004<br>(0.001)                                                | 1.004<br>(0.002) | 1.006<br>(0.002) | 1.001<br>(0.002) | 0.995<br>(0.002) |
| M 45–64                | 1.011<br>(0.004)                                                | 1.013<br>(0.004) | 1.016<br>(0.005) | 1.006<br>(0.004) | 0.992<br>(0.003) |
| M ≥65                  | 1.016<br>(0.006)                                                | 1.018<br>(0.006) | 1.023<br>(0.007) | 1.011<br>(0.006) | 0.991<br>(0.003) |
| <u>Females</u>         |                                                                 |                  |                  |                  |                  |
| All females            | 1.005<br>(0.002)                                                | 1.005<br>(0.002) | 1.007<br>(0.002) | 1.002<br>(0.002) | 0.996<br>(0.001) |
| F 25–44                | 1.002<br>(0.001)                                                | 1.003<br>(0.001) | 1.004<br>(0.001) | 1<br>(0.001)     | 0.997<br>(0.001) |
| F 45–64                | 1.006<br>(0.002)                                                | 1.007<br>(0.002) | 1.009<br>(0.003) | 1.003<br>(0.002) | 0.996<br>(0.002) |
| F ≥65                  | 1.009<br>(0.004)                                                | 1.011<br>(0.004) | 1.016<br>(0.004) | 1.004<br>(0.004) | 0.995<br>(0.002) |

<sup>a</sup> Values presented are the modeled expected mean (SD) of medians for the whole population and for each demographic group among individuals at least 25 years of age. Increased MeHg content in local foods is assumed to have no impact on cancer risks.

<sup>b</sup> Representative basket of nutritious store-bought foods (SI Figure S2)

## References

- Calder, R. S. D., A. T. Schartup, M. Li, A. P. Valberg, P. H. Balcom and E. M. Sunderland (2016). "Future impacts of hydroelectric power development on methylmercury exposures of Canadian indigenous communities." Environ Sci Technol **50**(23): 13115-22.
- Durkalec, A., T. Sheldon and T. Bell, (Eds.) (2016). Scientific Report. Lake Melville: Avativut, Kanuittailinnivut. Nain, NL: Nunatsiavut Government.
- Gustavsson, J., C. Cederberg, U. Sonersson, R. van Otterdijk and A. Meybeck (2011). "Global Food Losses and Food Waste: Extent, Causes and Prevention." Rome, Italy: United Nations Food and Agriculture Organization (UN FAO).
- Health Canada (2004). "Mercury: Your Health and the Environment: A Resource Tool." Retrieved 2017-11-21 from <https://www.canada.ca/en/health-canada/services/environmental-workplace-health/reports-publications/environmental-contaminants/mercury-your-health-environment-resource-tool.html>.
- Health Canada (2007). "Updating the Existing Risk Management Strategy for Mercury in Retail Fish." Ottawa, ON.
- McDowell, M. A., C. F. Dillon, J. Osterloh, P. M. Bolger, E. Pellizzari, R. Fernando, . . . K. R. Mahaffey (2004). "Hair Mercury Levels in U.S. Children and Women of Childbearing Age: Reference Range Data from NHANES 1999-2000." Environ Health Perspect **112**(11): 1165-71.
- Statistics Canada (2012). "Census Profile." 2011 Census. Retrieved 2018-03-18 from <http://www12.statcan.gc.ca/census-recensement/2011/dp-pd/prof/index.cfm?Lang=E>.
- Statistics Canada (2013). "2011 National Household Survey." Retrieved 2018-03-18 from <http://www12.statcan.gc.ca/nhs-enm/2011/dp-pd/prof/index.cfm?Lang=E>.
